# Supplementary material for: MACl-Induced Controlled Crystallization in Sequentially Deposited Perovskites for High-Efficiency and Stable Perovskite Solar Cells
Source: MDPI journal article supplement (doi:10.3390/coatings13111885), 2023-11-02
Supplement: s1 [file s1]

# Supplementary Materials: MACl-Induced Controlled Crystallization in Sequentially Deposited Perovskites for High-Efficiency and Stable Perovskite Solar Cells

Qiang Ma <sup>1,\*</sup>, Yulong Zhang <sup>2,†</sup>, Chaoqun Lu <sup>3,†</sup>, Rui Zhang <sup>4</sup>, Xinjie Wang <sup>4</sup>, Weijia Zhang <sup>5,\*</sup> and Zhaoyi Jiang <sup>4,\*</sup>

<sup>1</sup> School of Advanced Interdisciplinary Studies, Ningxia University, Zhongwei 755000, China

<sup>2</sup> Department of Basic Courses, Officers College of PAP, Chengdu 610213, China; jiangzhaoyan1991@163.com

<sup>3</sup> Puyang Institute of Technology, Henan University, Puyang 457000, China; 18639305901@163.com

<sup>4</sup> School of Applied Science, Taiyuan University of Science and Technology, Taiyuan 610213, China; zrx\_0921@tyust.edu.cn (R.Z.); xjwang@tyust.edu.cn (X.W.)

<sup>5</sup> Center of Condensed Matter and Material Physics, School of Physics, Beihang University, Beijing 100191, China

\* Correspondence: maq@nxu.edu.cn (Q.M.); zwjghx@buaa.edu.cn (W.Z.); jiangzhaoyi1991@buaa.edu.cn (Z.J.)

† These authors contributed equally to this work.

**Table S1.** Fitted EIS data of pure perovskite and MAPbCl<sub>3</sub>-induced PSCs.

| Sample                       | <i>R<sub>s</sub></i> (ohm) | <i>R<sub>CT</sub></i> (ohm) | <i>R<sub>REC</sub></i> (ohm) |
|------------------------------|----------------------------|-----------------------------|------------------------------|
| Pure perovskite              | 30.4                       | 99.3                        | 425.6                        |
| MAPbCl <sub>3</sub> -induced | 29.7                       | 82.9                        | 618.5                        |

**Citation:** Ma, Q.; Zhang, Y.; Lu, C.; Zhang, R.; Wang, X.; Zhang, W.; Jiang, Z. MACl-Induced Controlled Crystallization in Sequentially Deposited Perovskites for High-Efficiency and Stable Perovskite Solar Cells. *Coatings* **2023**, *13*, 1885. <https://doi.org/10.3390/coatings13111885>

Academic Editors: Alessandro Latini and Alexandre Botas

Received: 6 October 2023

Revised: 30 October 2023

Accepted: 31 October 2023

Published: 2 November 2023

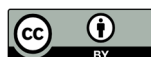

**Copyright:** © 2023 by the authors. Licensee MDPI, Basel, Switzerland. This article is an open access article distributed under the terms and conditions of the Creative Commons Attribution (CC BY) license (<https://creativecommons.org/licenses/by/4.0/>).

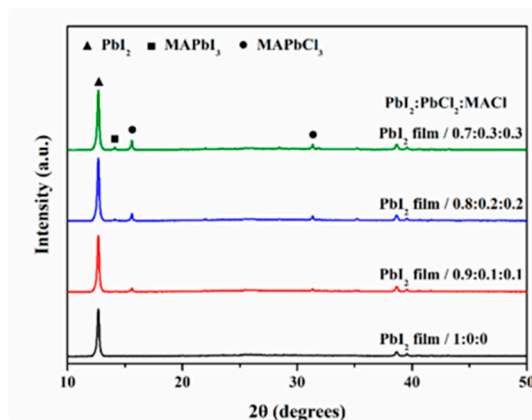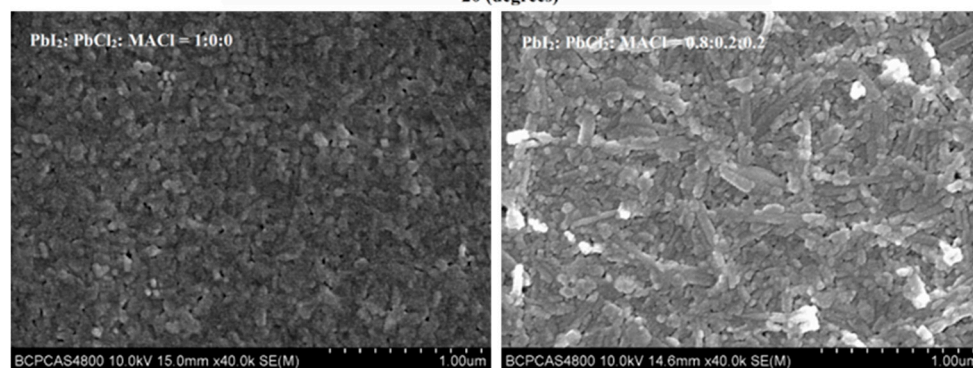

**Figure S1.** XRD and top-view SEM images of pure PbI<sub>2</sub> and PbI<sub>2</sub> films containing MAPbCl<sub>3</sub>.

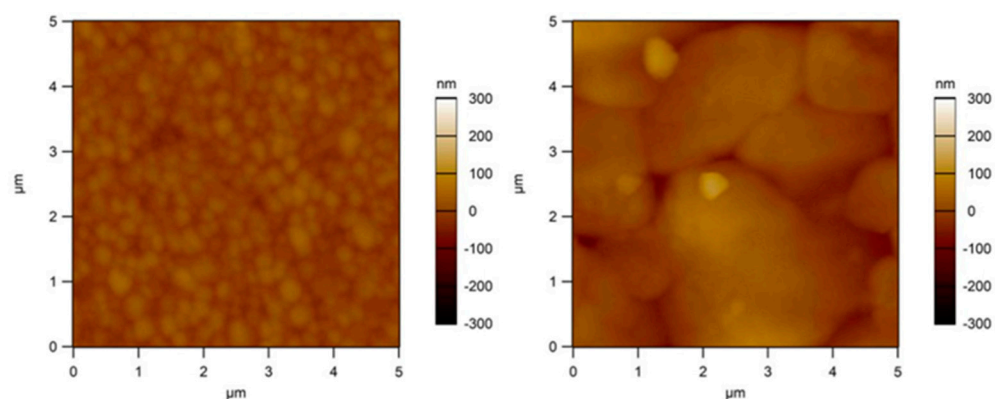

**Figure S2.** AFM of perovskite film prepared from a precursor solution containing  $\text{PbI}_2\text{:PbCl}_2\text{:MACl}$  in 1:0:0 and 0.8:0.2:0.2 ratios.

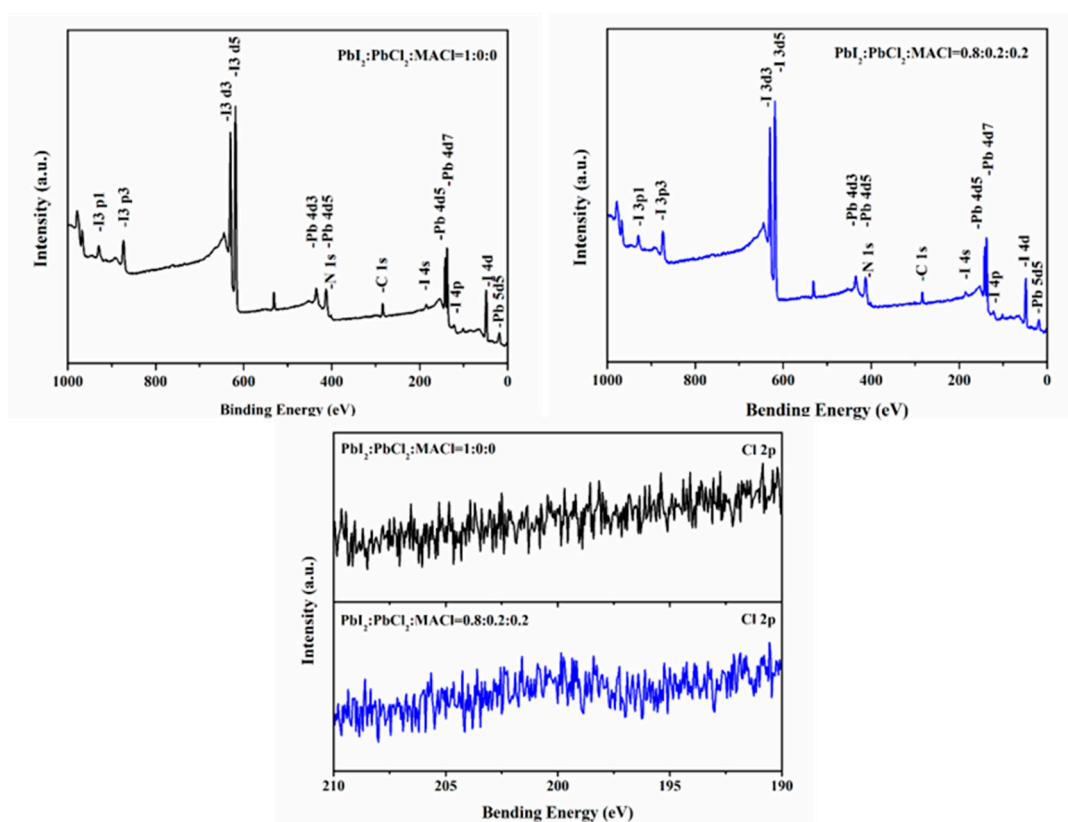

**Figure S3.** XPS spectra of perovskite film prepared from a precursor solution containing  $\text{PbI}_2\text{:PbCl}_2\text{:MACl}$  in 1:0:0 and 0.8:0.2:0.2 ratios.

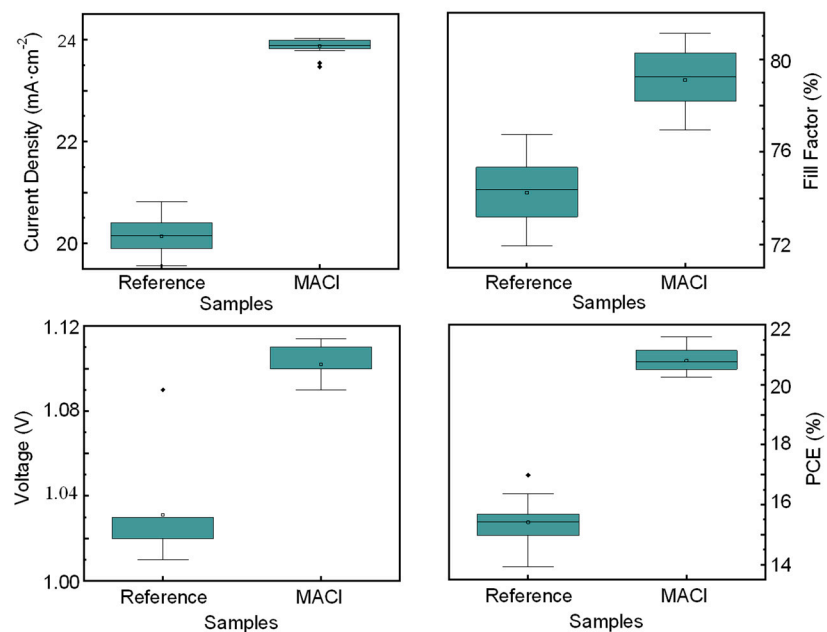

Figure S4. Distribution of photovoltaic parameters of perovskite solar cells.

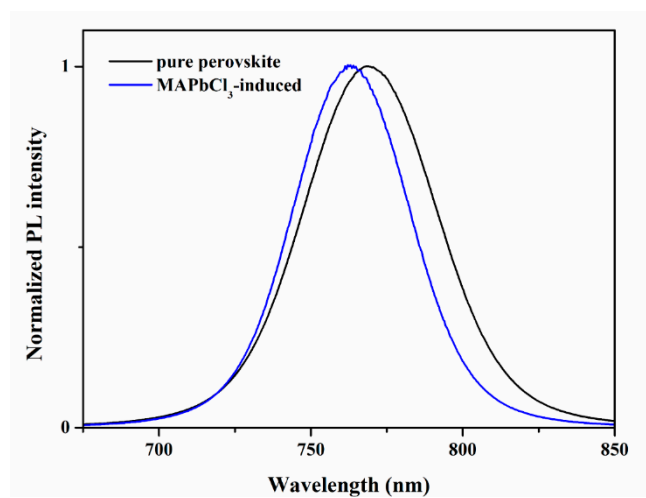

Figure S5. Normalized steady-state PL spectra of pure perovskite and MAPbCl<sub>3</sub>-induced films.
